# Supplementary material
Source: MDPI journal article supplement (https://www.mdpi.com/2311-7524/8/2/172)

Supplementary File S1:  
Experimental design layout in  
the field

**Legend:**

V = variety

B = border row

R = replicate

T = treatment

**Treatment combinations:**

- T<sub>1</sub> = 15 cm in-row spacing; 90 DAP
- T<sub>2</sub> = 30 cm in-row spacing; 120 DAP
- T<sub>3</sub> = 15 cm in-row spacing; 120 DAP
- T<sub>4</sub> = 30 cm in-row spacing; 90 DAP

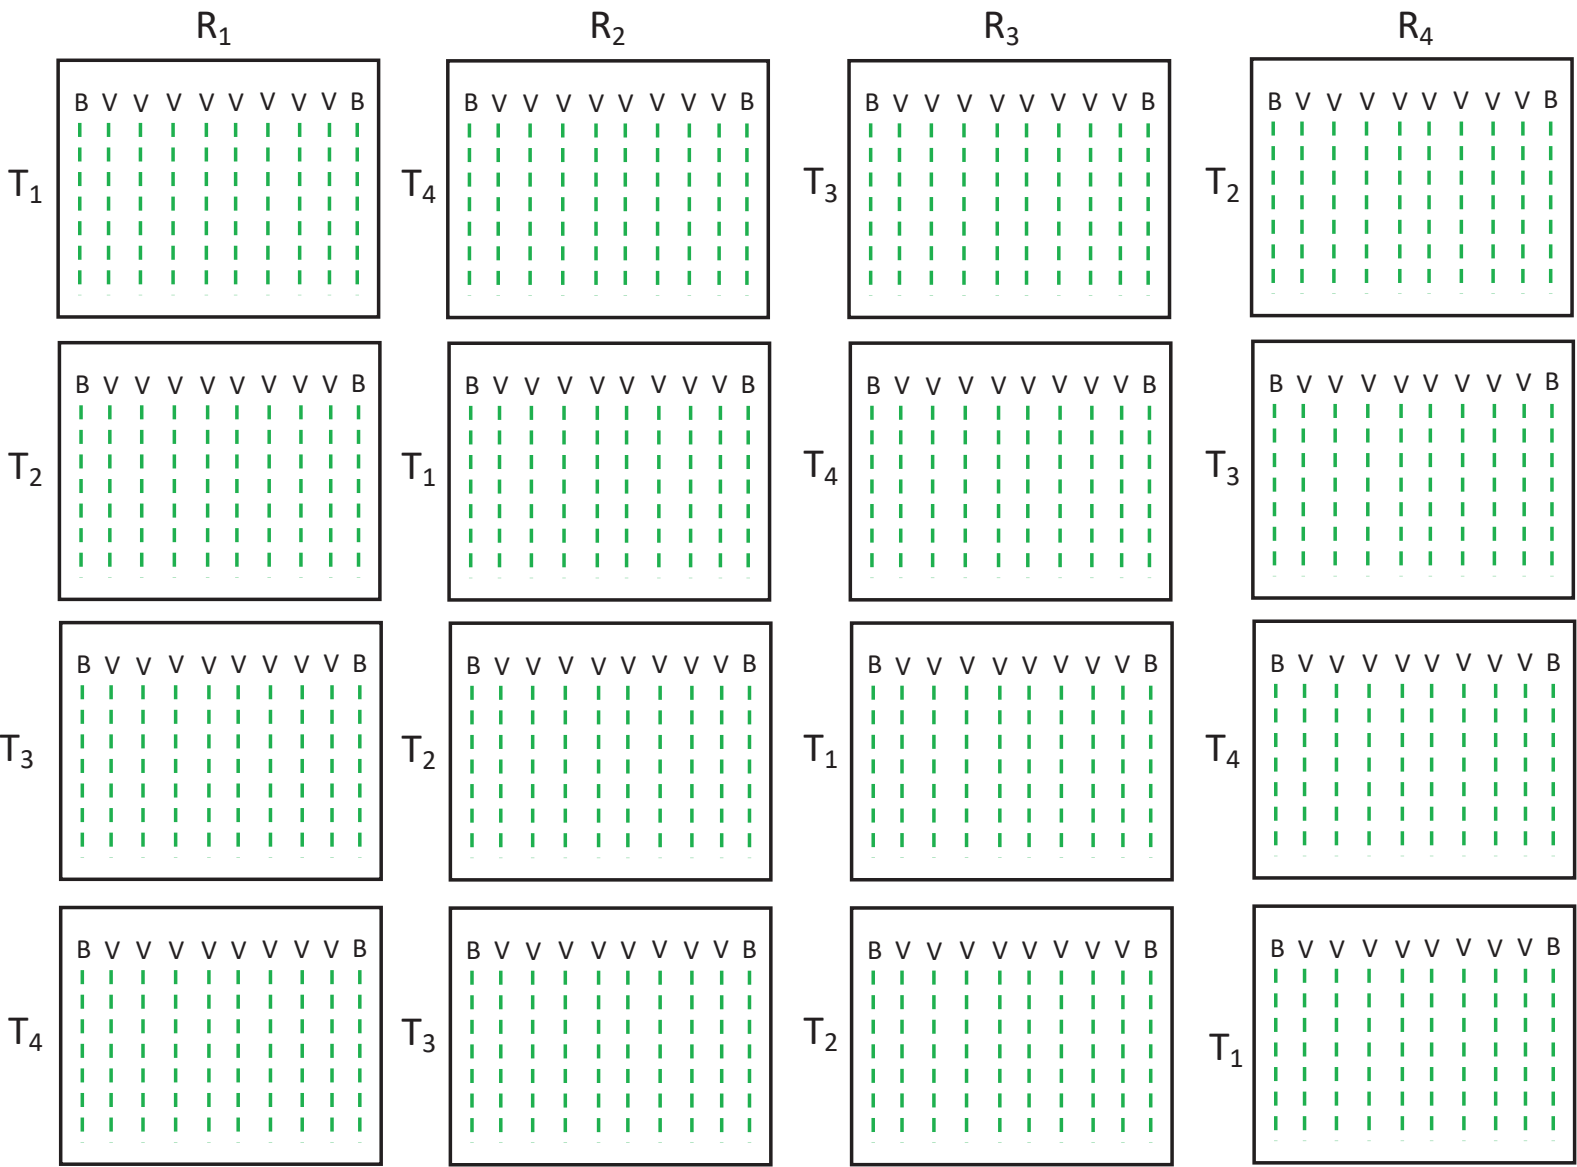

Supplement: s1 [file s1]
